# Supplementary figures and images for: Normative productivity of the global vegetation
Source: Springer Nature journal article supplement (doi:10.1186/1750-0680-3-8), 2008-12-01

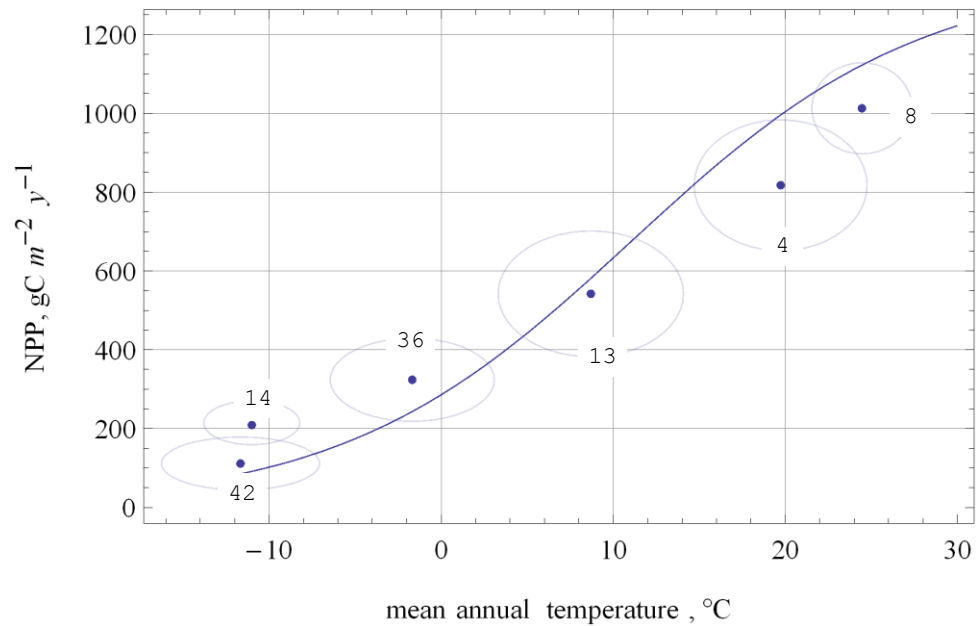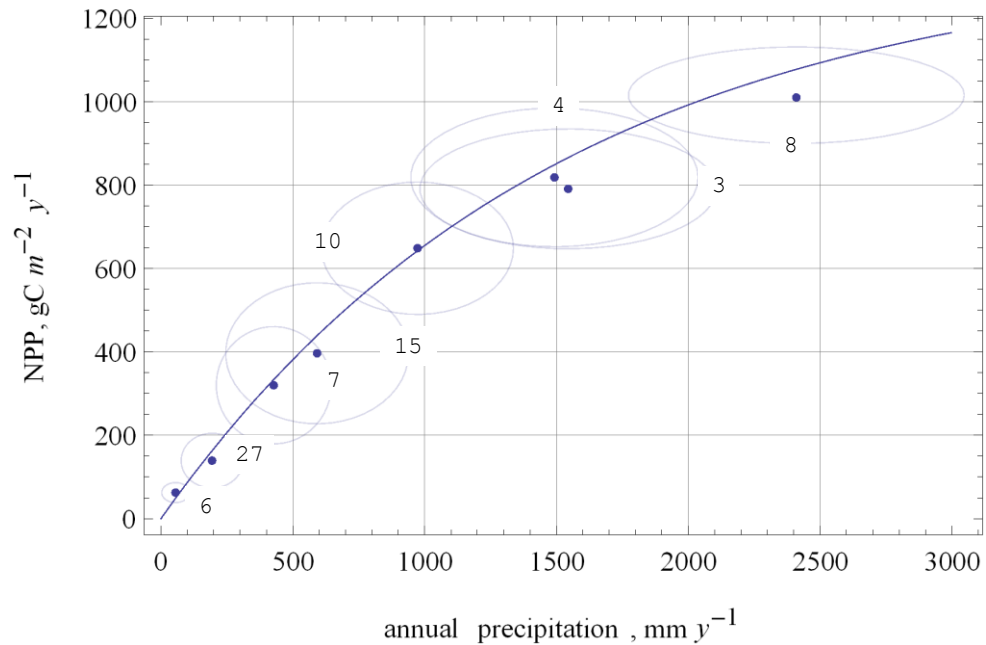

Supplement: 13021_2008_35_MOESM18_ESM.pdf [file 13021_2008_35_MOESM18_ESM.pdf]

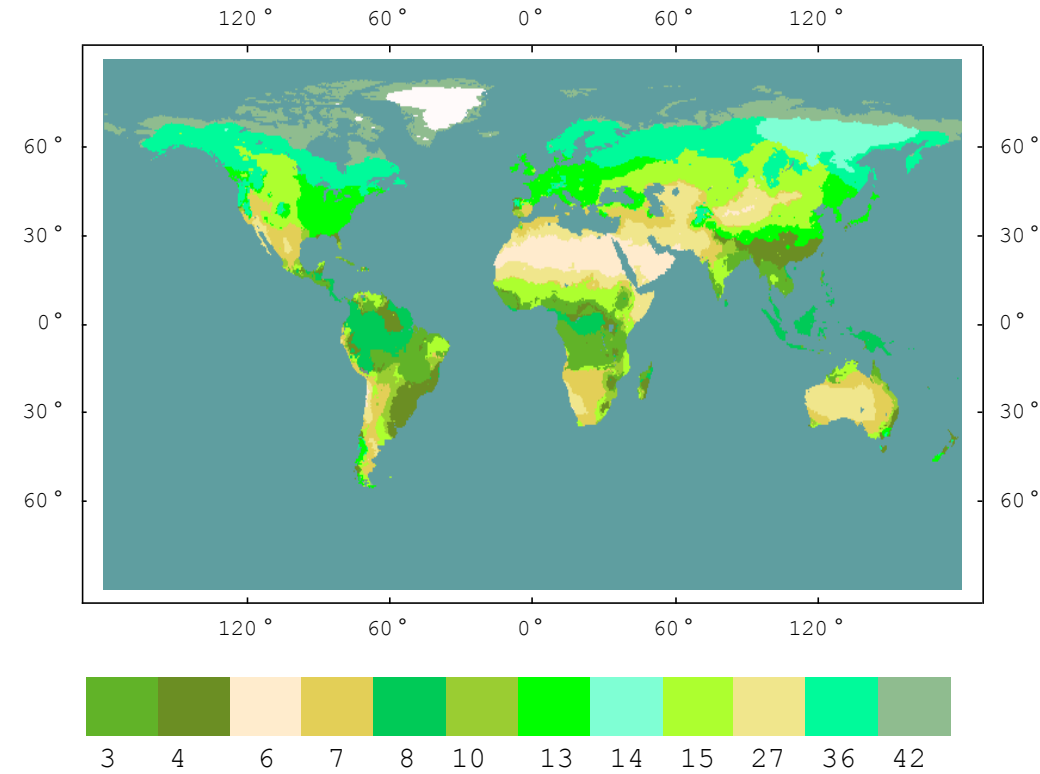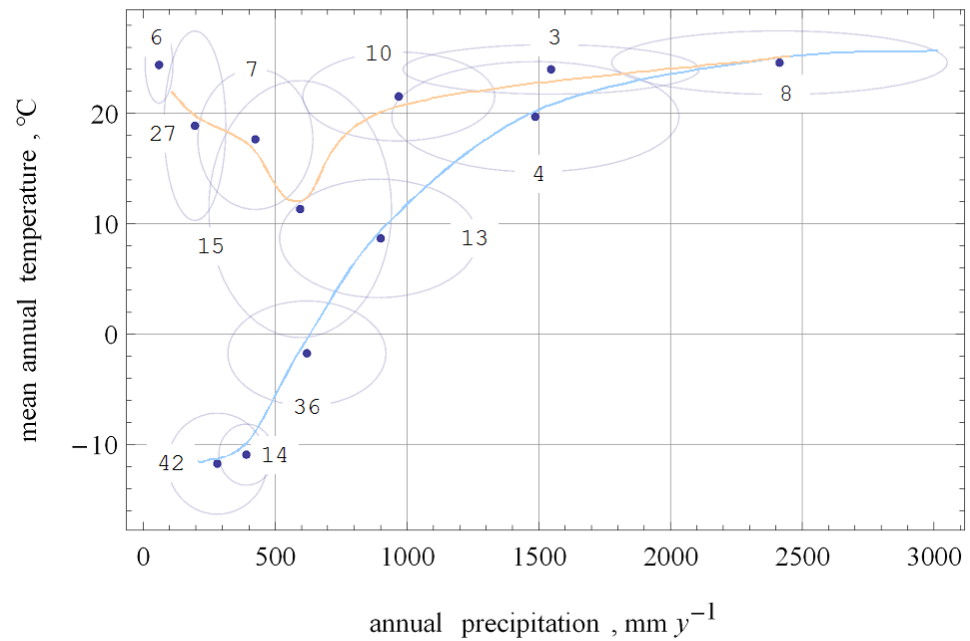

Supplement: 13021_2008_35_MOESM19_ESM.pdf [file 13021_2008_35_MOESM19_ESM.pdf]

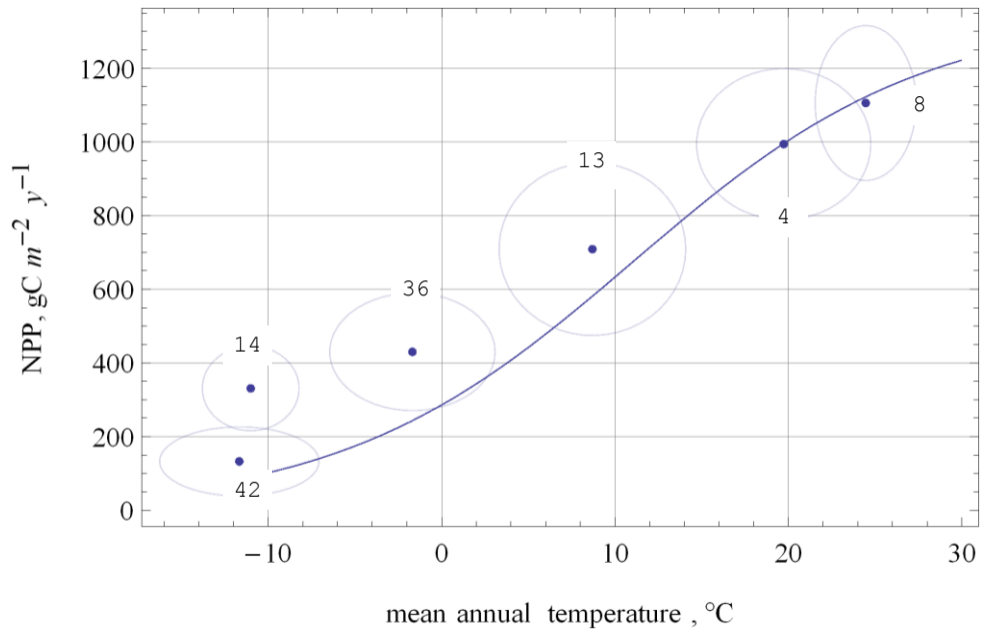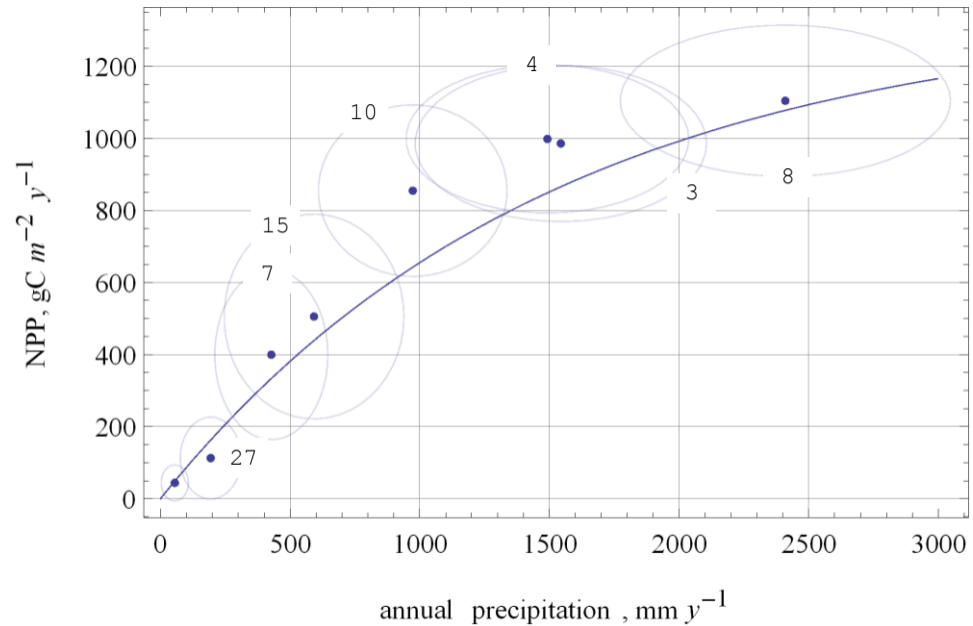

Supplement: 13021_2008_35_MOESM20_ESM.pdf [file 13021_2008_35_MOESM20_ESM.pdf]

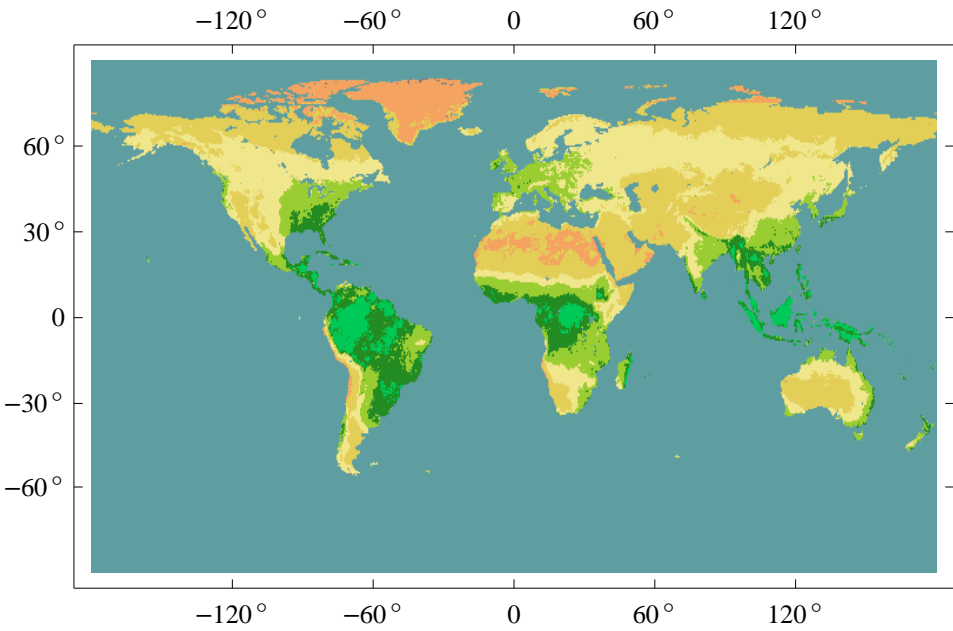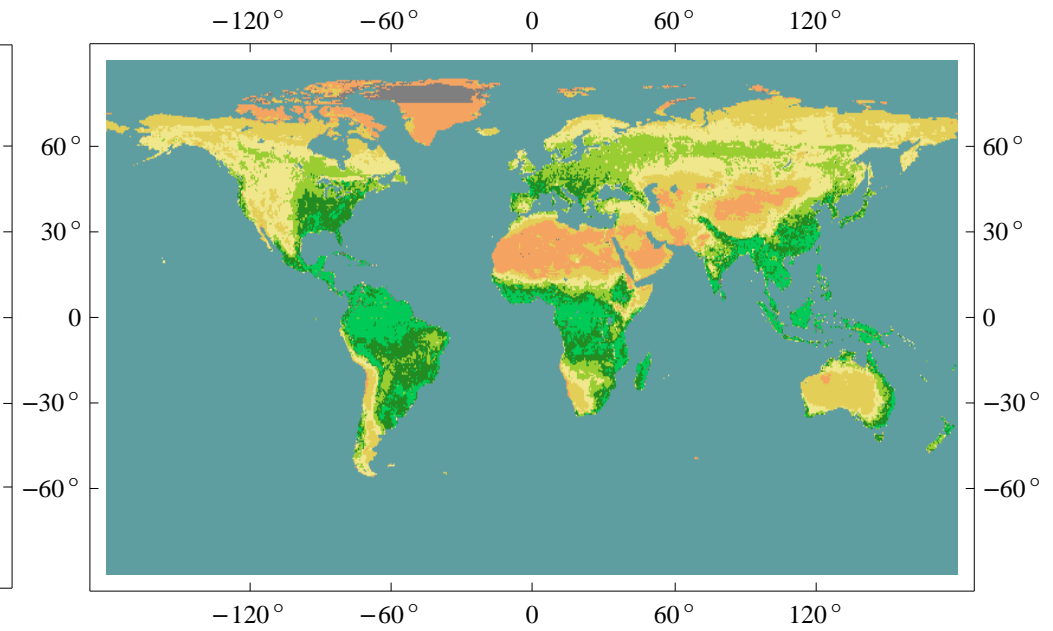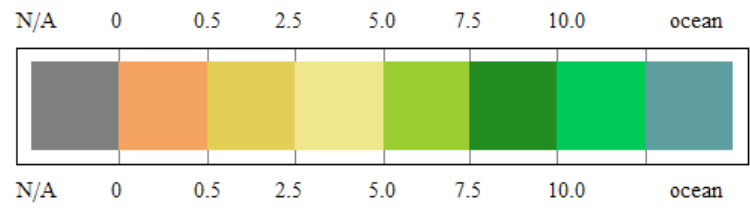

Supplement: 13021_2008_35_MOESM21_ESM.pdf [file 13021_2008_35_MOESM21_ESM.pdf]

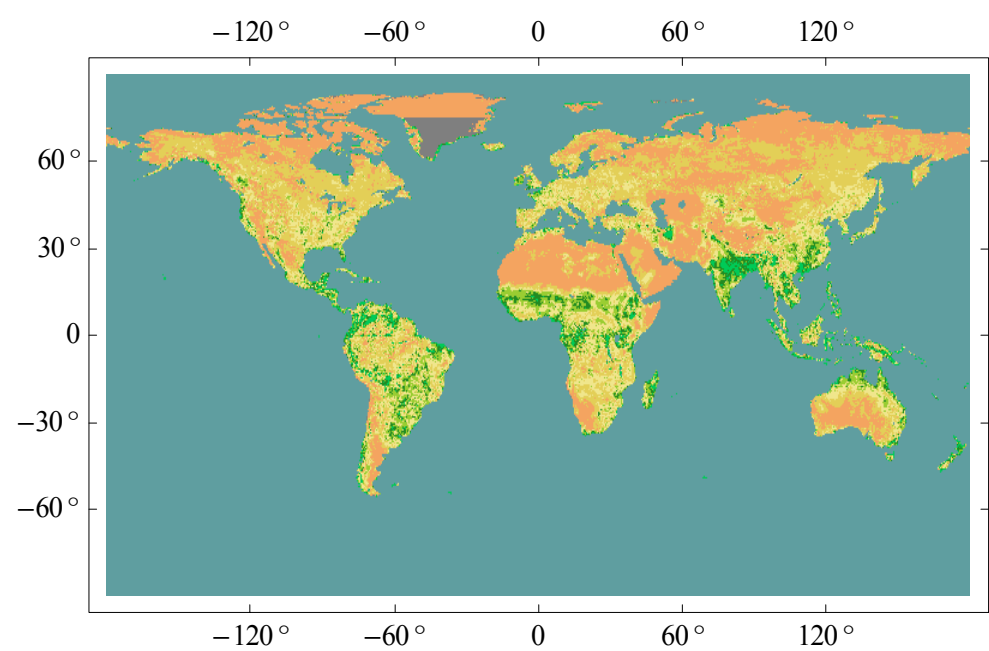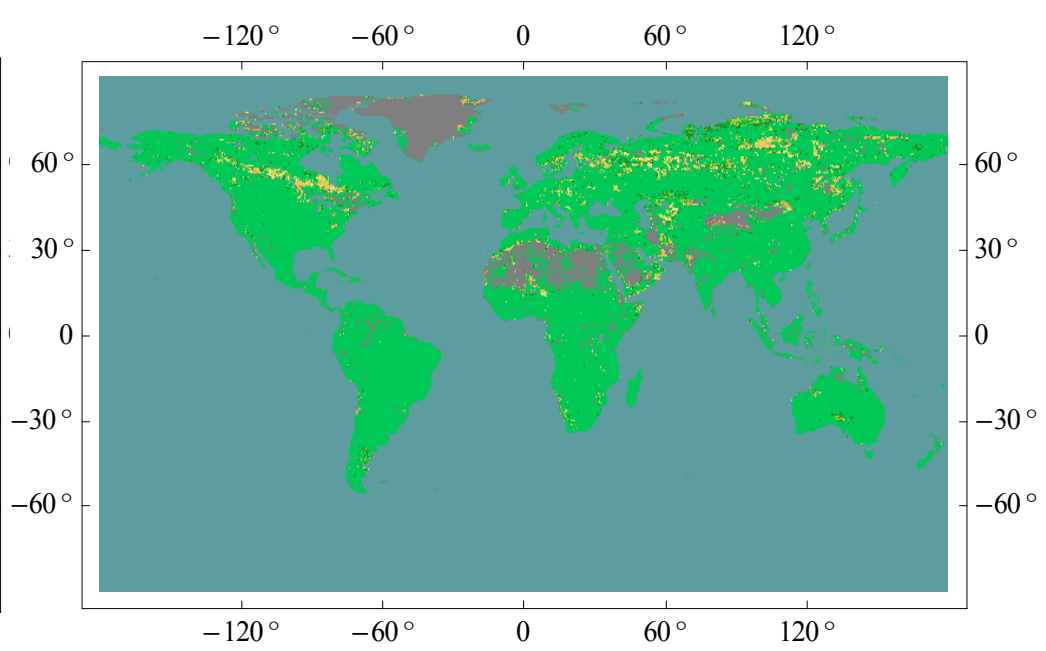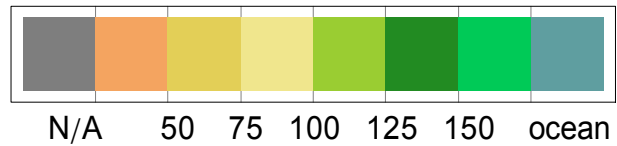

Supplement: 13021_2008_35_MOESM22_ESM.pdf [file 13021_2008_35_MOESM22_ESM.pdf]
